# Supplementary material for: Egg white-mediated green synthesis of CuS quantum dots as a biocompatible and efficient 980 nm laser-driven photothermal agent
Source: Royal Society of Chemistry journal article supplement (doi:10.1039/c5ra26801j), 2016-01-01
Supplement: c5ra26801j1.pdf [file c5ra26801j1.pdf]

## Supporting Information for

### Egg white-mediated green synthesis of CuS quantum dots as biocompatible and efficient 980 nm laser-driven photothermal agent

Runzhi Zhong,<sup>a, †</sup> Chen Peng,<sup>b, †</sup> Liang Chen,<sup>c</sup> NuoYu,<sup>a</sup> Zixiao Liu,<sup>a</sup> Meifang Zhu,<sup>a</sup>

Chuanglong He,<sup>c</sup> and Zhigang Chen<sup>\*a</sup>

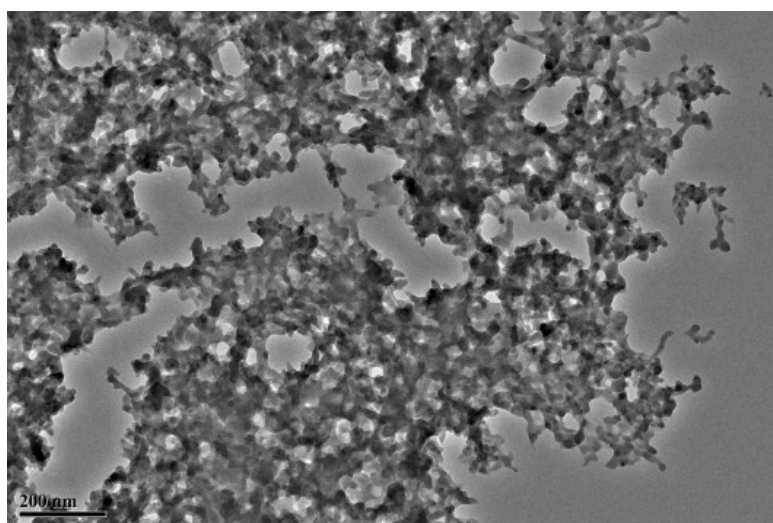

**Fig. S1** TEM image of CuS sample prepared in the absence of CEW ligands.

---

<sup>a</sup>State Key Laboratory for Modification of Chemical Fibers and Polymer Materials, College of Materials Science and Engineering, Donghua University, Shanghai 201620, China. E-mail: [zgchen@dhu.edu.cn](mailto:zgchen@dhu.edu.cn)

<sup>b</sup>Department of Radiology, Shanghai Tenth People's Hospital, School of Medicine, Tongji University, Shanghai 200072, China.

<sup>c</sup>College of Chemistry, Chemical Engineering and Biotechnology, Donghua University, Shanghai, China.

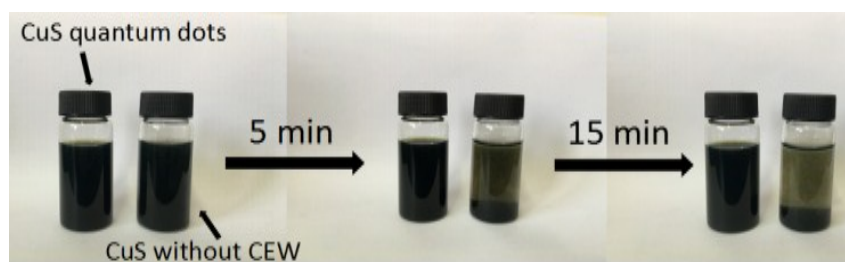

**Fig. S2** The photos of the aqueous solutions containing CEW-capped CuS QDs or CuS without CEW.

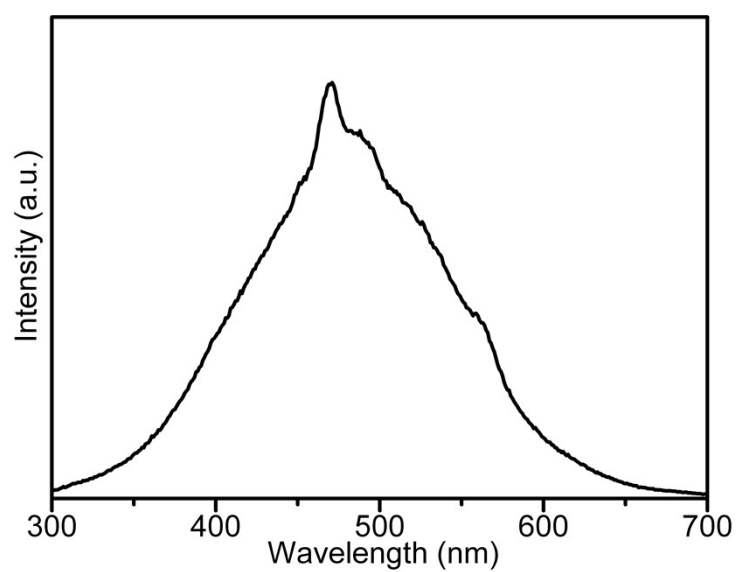

**Fig. S3** The fluorescent spectrum of CEW-capped CuS QDs.
